# Supplementary material for: Application of biological-based nano and nano magnetic catalysts in the preparation of arylbispyranylmethanes
Source: Royal Society of Chemistry journal article supplement (doi:10.1039/c6ra18719f), 2016-01-01

## **Application of biological-based nano and nano magnetic catalysts in the preparation of arylbispyranylmethanes**

Mohammad Ali Zolfigol,\* Monireh Navazeni, Meysam Yarie, Roya Ayazi-Nasrabadi\*

Department of Organic Chemistry, Faculty of Chemistry, Bu-Ali Sina University, Hamedan, Po. Box: 6517838683, Iran. E-mail: zolfi@basu.ac.ir, mzolfigol@yahoo.com, & r.ayazi.86@gmail.com, Fax: +98 8138380709; Tel: +98 8138282807

## Table of content

- 1: FT-IR spectrum of 3,3'-((4-hydroxyphenyl)methylene)bis(4-hydroxy-6-methyl-2H-pyran-2-one) (5e)
- 2: <sup>1</sup>H NMR spectrum of 3,3'-((4-hydroxyphenyl)methylene)bis(4-hydroxy-6-methyl-2H-pyran-2-one) (5e)
- 3: <sup>13</sup>C NMR spectrum of 3,3'-((4-hydroxyphenyl)methylene)bis(4-hydroxy-6-methyl-2H-pyran-2-one) (5e)
- 4: FT-IR spectrum of 3,3'-((2,4-dichlorophenyl)methylene)bis(4-hydroxy-6-methyl-2H-pyran-2-one) (5h)
- 5: <sup>1</sup>H NMR spectrum of 3,3'-((2,4-dichlorophenyl)methylene)bis(4-hydroxy-6-methyl-2H-pyran-2-one) (5h)
- 6: <sup>13</sup>C NMR spectrum of 3,3'-((2,4-dichlorophenyl)methylene)bis(4-hydroxy-6-methyl-2H-pyran-2-one) (5h)
- 7: FT-IR spectrum of 3,3'-((2-chlorophenyl)methylene)bis(4-hydroxy-6-methyl-2H-pyran-2-one) (5i)
- 8: <sup>1</sup>H NMR spectrum of 3,3'-((2-chlorophenyl)methylene)bis(4-hydroxy-6-methyl-2H-pyran-2-one) (5i)
- 9: <sup>13</sup>C NMR spectrum of 3,3'-((2-chlorophenyl)methylene)bis(4-hydroxy-6-methyl-2H-pyran-2-one) (5i)

**1: FT-IR spectrum of 3,3'-((4-hydroxyphenyl)methylene)bis(4-hydroxy-6-methyl-2H-pyran-2-one) (5e)**

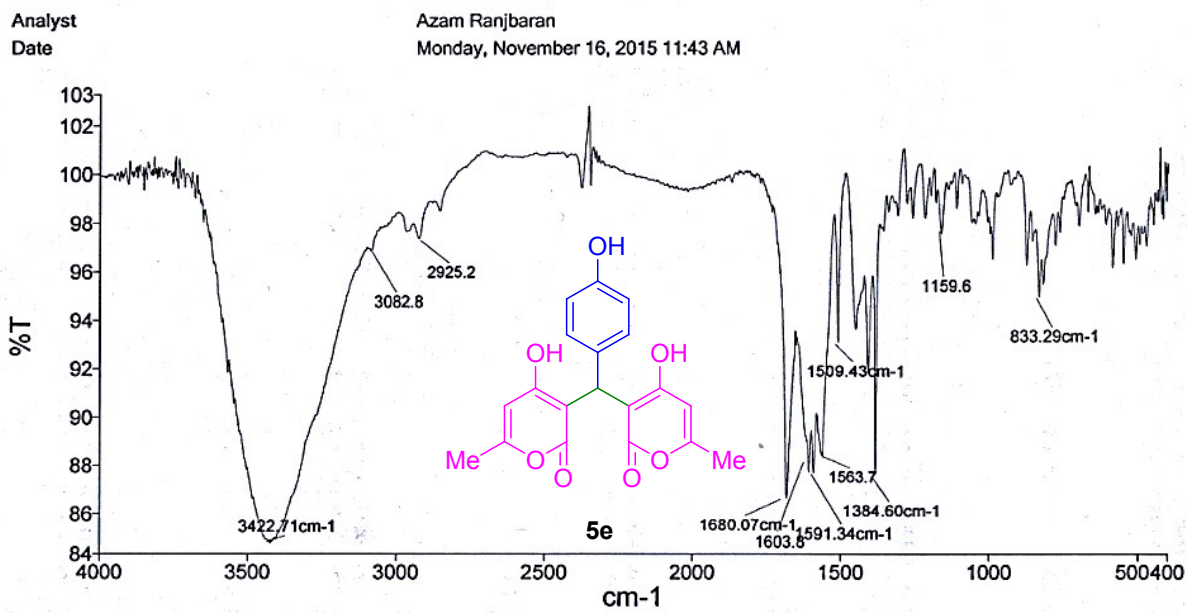

**2: <sup>1</sup>H NMR spectrum of 3,3'-((4-hydroxyphenyl)methylene)bis(4-hydroxy-6-methyl-2H-pyran-2-one) (5e)**

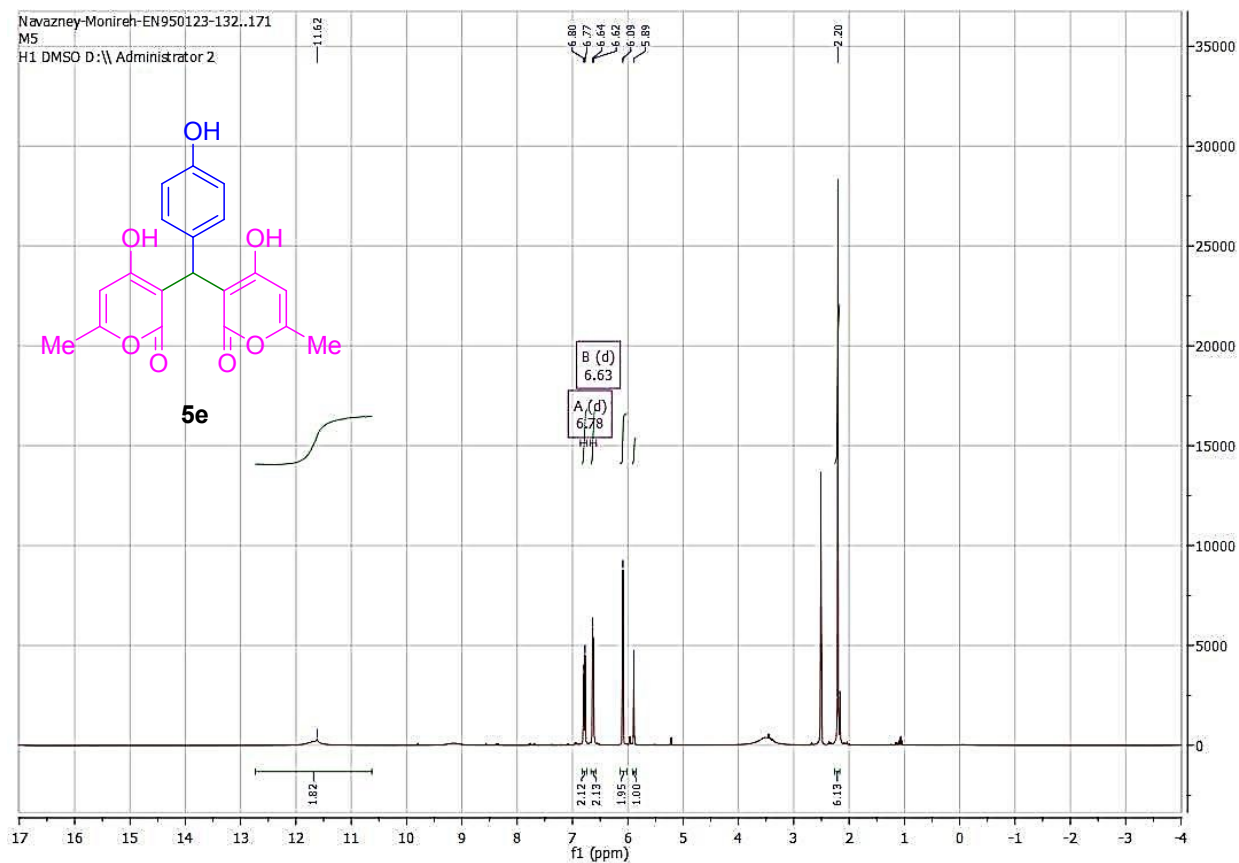

**3:  $^{13}\text{C}$  NMR spectrum of 3,3'-((4-hydroxyphenyl)methylene)bis(4-hydroxy-6-methyl-2H-pyran-2-one) (5e)**

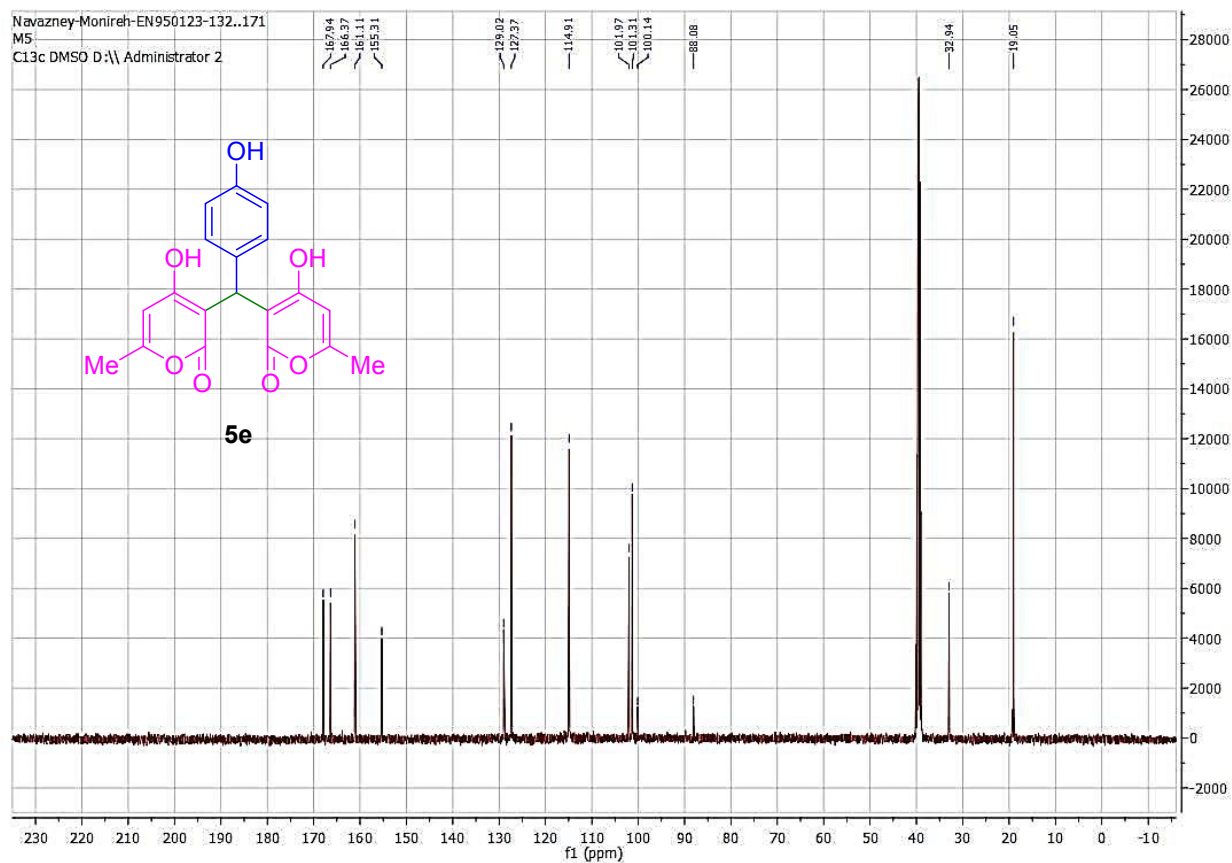

4: FT-IR spectrum of 3,3'-((2,4-dichlorophenyl)methylene)bis(4-hydroxy-6-methyl-2H-pyran-2-one) (5h)

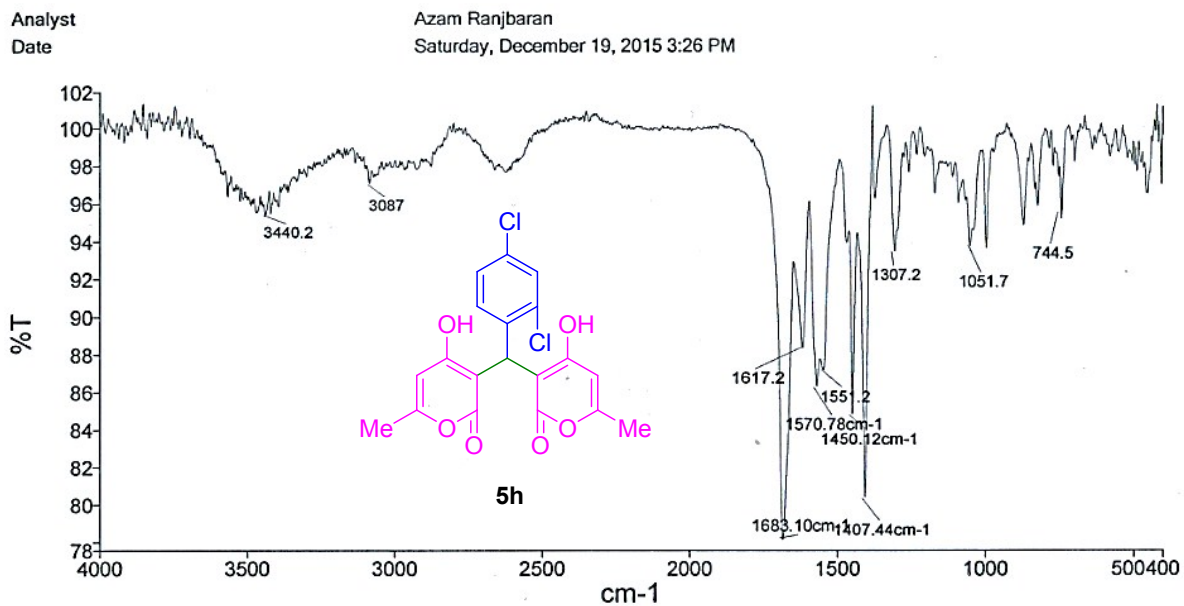

5: <sup>1</sup>H NMR spectrum of 3,3'-((2,4-dichlorophenyl)methylene)bis(4-hydroxy-6-methyl-2H-pyran-2-one) (5h)

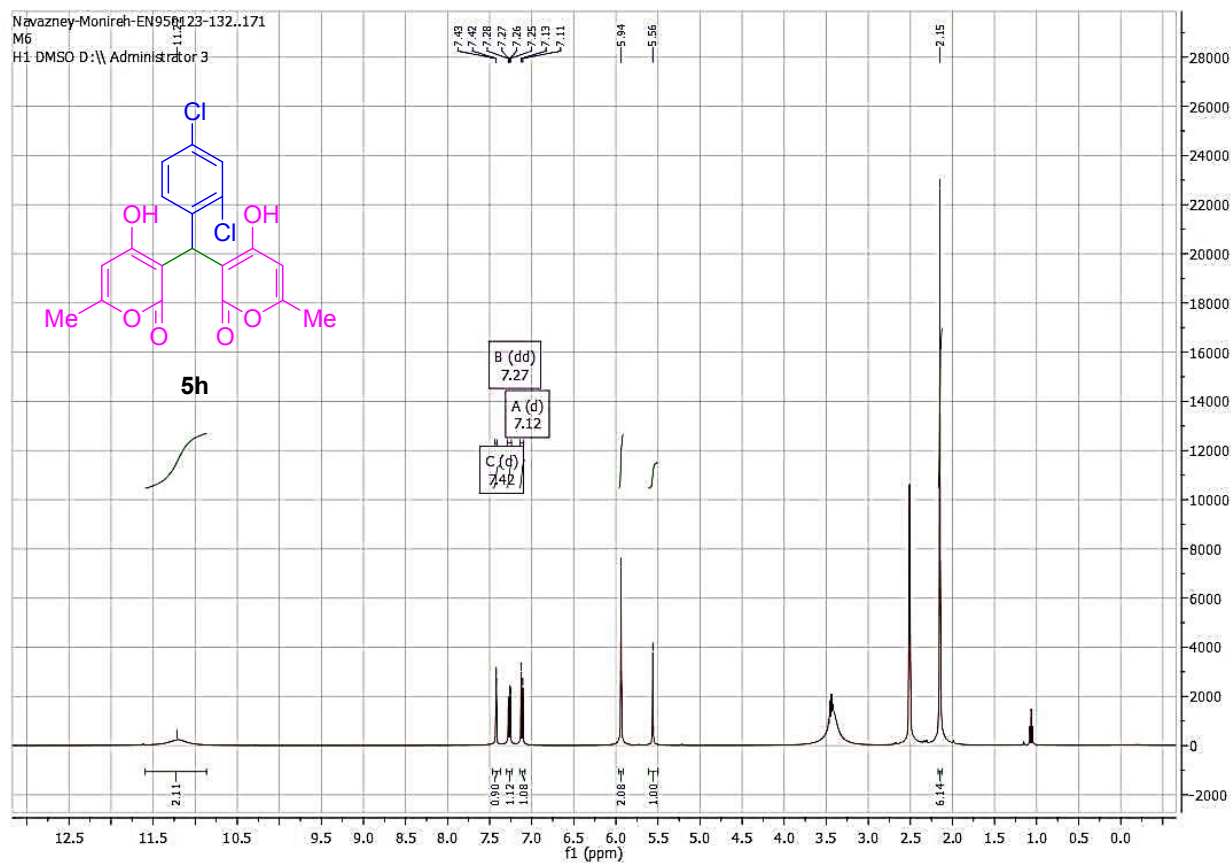

6: <sup>13</sup>C NMR spectrum of 3,3'-((2,4-dichlorophenyl)methylene)bis(4-hydroxy-6-methyl-2H-pyran-2-one) (5h)

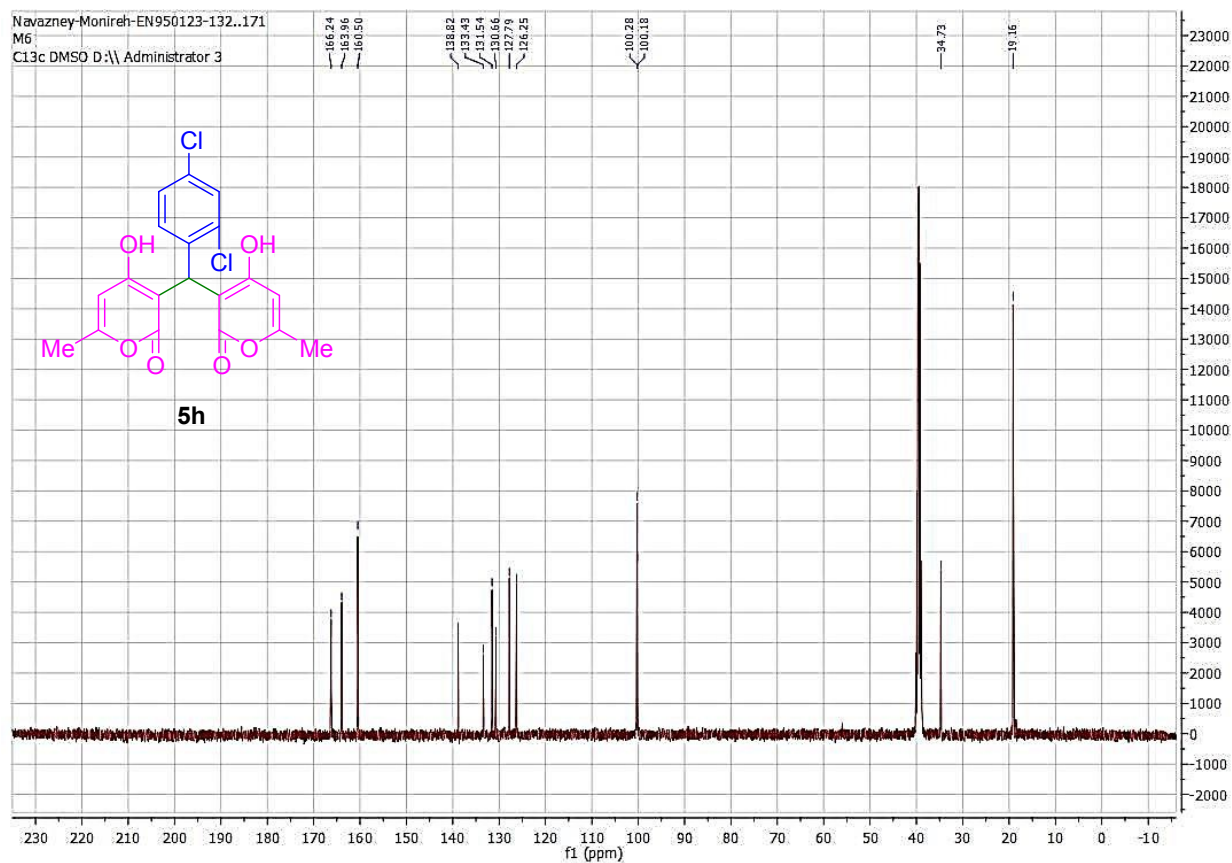



7: FT-IR spectrum of 3,3'-((2-chlorophenyl)methylene)bis(4-hydroxy-6-methyl-2H-pyran-2-one) (5i)

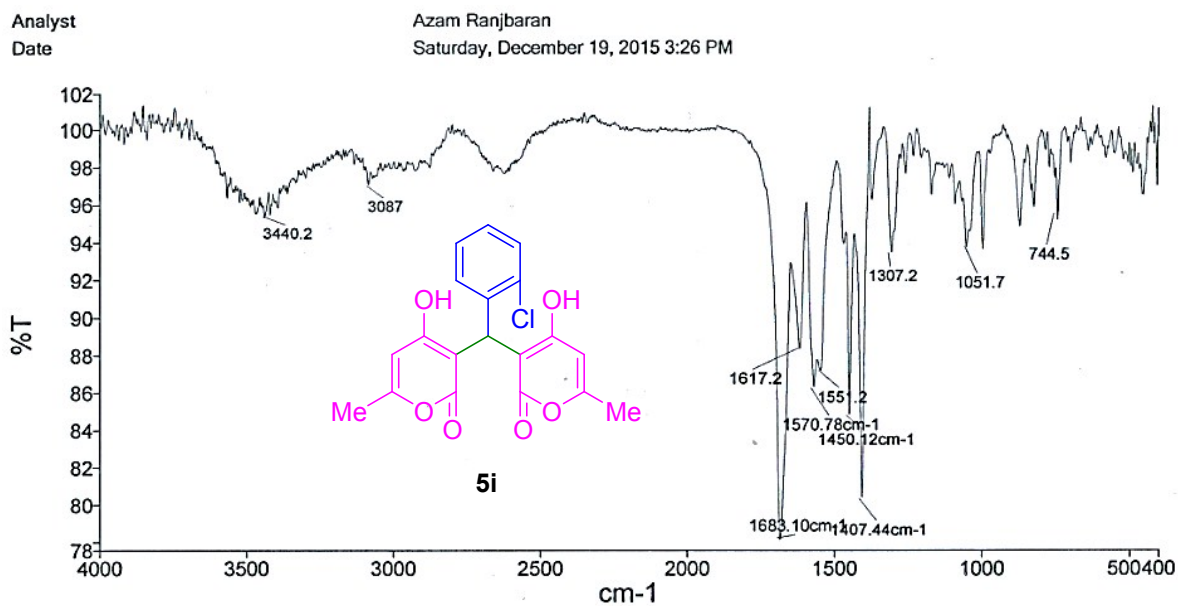

8:  $^1\text{H}$  NMR spectrum of 3,3'-((2-chlorophenyl)methylene)bis(4-hydroxy-6-methyl-2H-pyran-2-one) (5i)

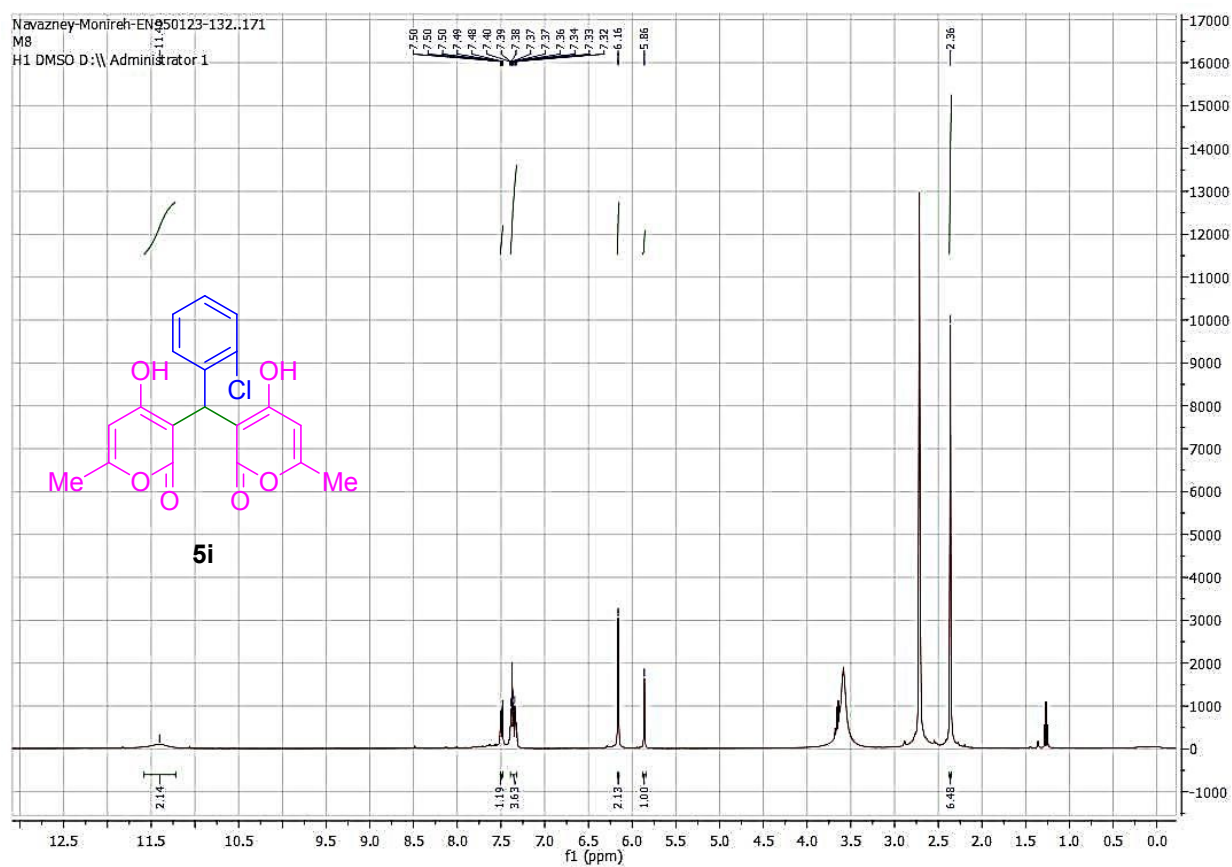

9:  $^{13}\text{C}$  NMR spectrum of 3,3'-((2-chlorophenyl)methylene)bis(4-hydroxy-6-methyl-2H-pyran-2-one) (5i)

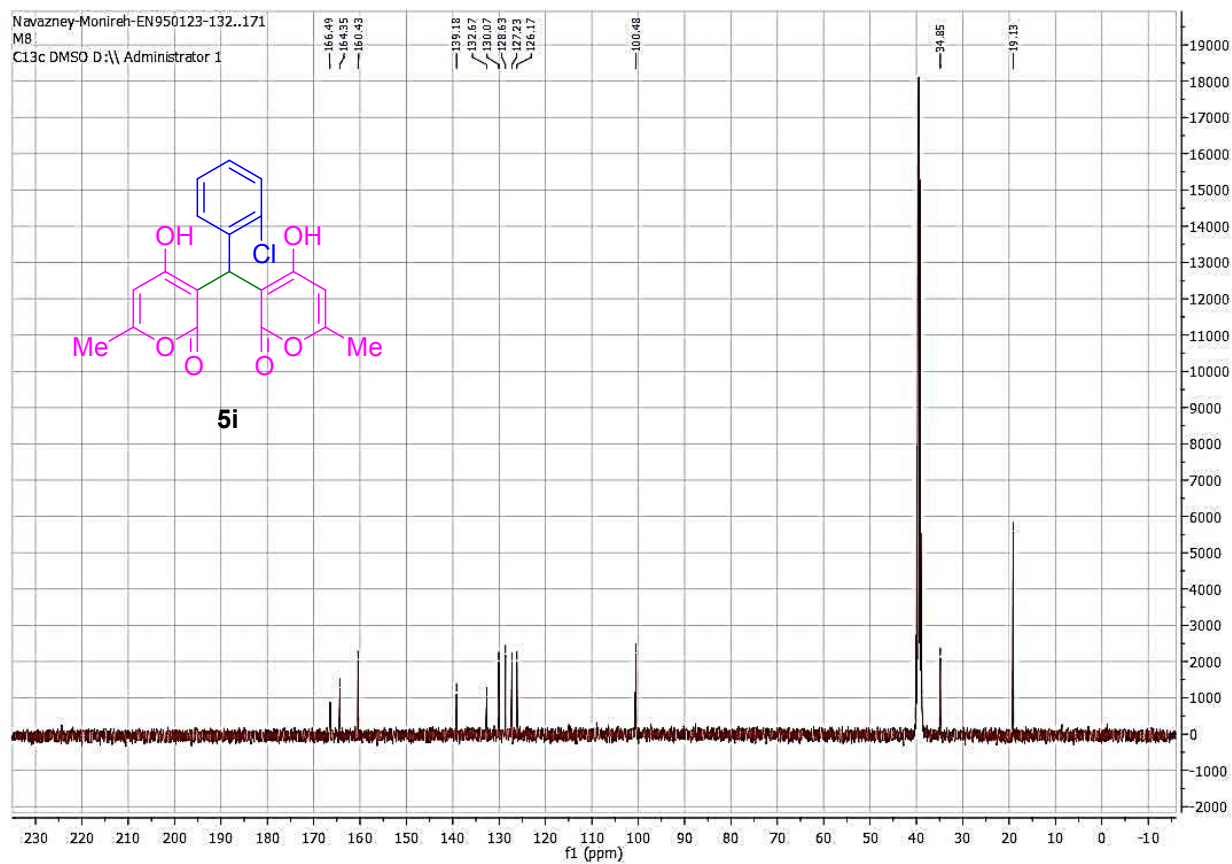

Supplement: c6ra18719f1.pdf [file c6ra18719f1.pdf]
